# Supplementary material for: Thermal debinding behavior of a low-toxic DMAA polymer for gelcast ceramic parts based on TG-FTIR and kinetic modeling
Source: Royal Society of Chemistry journal article supplement (doi:10.1039/c9ra00305c), 2019-01-01
Supplement: c9ra00305c1.pdf [file c9ra00305c1.pdf]

Table 1. Linear fit plots to determine the activation energy values using the C-R method.

| $\beta$ (°C/min) | n   | Slope    | Intercept | $R^2$  | p-value  | $E$ (kJ/mol) | $\ln(k_0)$ (s <sup>-1</sup> ) |
|------------------|-----|----------|-----------|--------|----------|--------------|-------------------------------|
| 5                | 0.1 | -2049.34 | -10.38    | 0.9204 | 5.82E-04 | 17.04        | -5.24                         |
|                  | 0.2 | -2138.94 | -10.20    | 0.9265 | 5.67E-04 | 17.78        | -5.02                         |
|                  | 0.3 | -2232.67 | -10.01    | 0.9314 | 5.54E-04 | 18.56        | -4.78                         |
|                  | 0.4 | -2330.70 | -9.81     | 0.9353 | 5.45E-04 | 19.38        | -4.54                         |
|                  | 0.5 | -2433.20 | -9.60     | 0.938  | 5.38E-04 | 20.23        | -4.29                         |
|                  | 0.6 | -2540.30 | -9.38     | 0.9396 | 5.34E-04 | 21.12        | -4.03                         |
|                  | 0.7 | -2652.13 | -9.16     | 0.9401 | 5.33E-04 | 22.05        | -3.76                         |
|                  | 0.8 | -2768.80 | -8.92     | 0.9395 | 5.34E-04 | 23.02        | -3.48                         |
|                  | 0.9 | -2890.37 | -8.68     | 0.9379 | 5.38E-04 | 24.03        | -3.20                         |
|                  | 1   | -3016.91 | -8.43     | 0.9352 | 5.45E-04 | 25.08        | -2.90                         |
|                  | 1.1 | -3148.41 | -8.17     | 0.9316 | 5.54E-04 | 26.18        | -2.60                         |
|                  | 1.2 | -3284.87 | -7.89     | 0.9271 | 5.65E-04 | 27.31        | -2.28                         |
|                  | 1.3 | -3426.24 | -7.61     | 0.9219 | 5.78E-04 | 28.49        | -1.96                         |
|                  | 1.4 | -3572.45 | -7.32     | 0.916  | 5.94E-04 | 29.70        | -1.63                         |
|                  | 1.5 | -3723.39 | -7.02     | 0.9095 | 6.12E-04 | 30.96        | -1.29                         |
|                  | 1.6 | -3878.93 | -6.72     | 0.9026 | 6.31E-04 | 32.25        | -0.94                         |
|                  | 1.7 | -4038.94 | -6.40     | 0.8952 | 6.53E-04 | 33.58        | -0.58                         |
|                  | 1.8 | -4203.24 | -6.08     | 0.8877 | 6.76E-04 | 34.95        | -0.22                         |
|                  | 1.9 | -4371.68 | -5.74     | 0.8799 | 7.00E-04 | 36.35        | 0.16                          |
|                  | 2   | -4544.07 | -5.40     | 0.8721 | 7.26E-04 | 37.78        | 0.53                          |
|                  | 2.1 | -4720.23 | -5.06     | 0.8642 | 7.53E-04 | 39.24        | 0.92                          |
|                  | 2.2 | -4899.97 | -4.70     | 0.8564 | 7.81E-04 | 40.74        | 1.31                          |
|                  | 2.3 | -5083.11 | -4.34     | 0.8487 | 8.10E-04 | 42.26        | 1.71                          |
|                  | 2.4 | -5269.47 | -3.98     | 0.8411 | 8.40E-04 | 43.81        | 2.11                          |
|                  | 2.5 | -5458.88 | -3.61     | 0.8337 | 8.70E-04 | 45.39        | 2.52                          |
|                  | 2.6 | -5651.18 | -3.23     | 0.8265 | 9.00E-04 | 46.98        | 2.93                          |
|                  | 2.7 | -5846.19 | -2.84     | 0.8195 | 9.30E-04 | 48.61        | 3.34                          |
|                  | 2.8 | -6043.78 | -2.46     | 0.8128 | 9.61E-04 | 50.25        | 3.77                          |
|                  | 2.9 | -6243.80 | -2.06     | 0.8063 | 9.91E-04 | 51.91        | 4.19                          |
|                  | 3   | -6446.10 | -1.67     | 0.8001 | 1.02E-03 | 53.59        | 4.62                          |
|                  | 3.1 | -6650.57 | -1.27     | 0.7941 | 1.05E-03 | 55.29        | 5.05                          |
|                  | 3.2 | -6857.09 | -0.86     | 0.7884 | 1.08E-03 | 57.01        | 5.49                          |
|                  | 3.3 | -7065.54 | -0.45     | 0.7829 | 1.11E-03 | 58.74        | 5.93                          |
|                  | 3.4 | -7275.82 | -0.04     | 0.7777 | 1.14E-03 | 60.49        | 6.37                          |
|                  | 3.5 | -7487.82 | 0.38      | 0.7727 | 1.17E-03 | 62.25        | 6.81                          |
|                  | 3.6 | -7701.47 | 0.80      | 0.768  | 1.20E-03 | 64.03        | 7.26                          |
|                  | 3.7 | -7916.67 | 1.22      | 0.7634 | 1.22E-03 | 65.82        | 7.71                          |
|                  | 3.8 | -8133.34 | 1.64      | 0.7591 | 1.25E-03 | 67.62        | 8.16                          |
|                  | 3.9 | -8351.40 | 2.07      | 0.755  | 1.28E-03 | 69.43        | 8.62                          |
|                  | 4   | -8570.80 | 2.50      | 0.7511 | 1.30E-03 | 71.26        | 9.07                          |

| $\beta$ (°C/min) | n   | Slope     | Intercept | $R^2$  | p-value  | $E$ (kJ/mol) | $Ln(k_0)$ (s <sup>-1</sup> ) |
|------------------|-----|-----------|-----------|--------|----------|--------------|------------------------------|
| 15               | 0.1 | -3221.03  | -8.90     | 0.8527 | 7.95E-04 | 26.78        | -2.20                        |
|                  | 0.2 | -3357.11  | -8.65     | 0.8646 | 7.52E-04 | 27.91        | -1.92                        |
|                  | 0.3 | -3499.81  | -8.39     | 0.8758 | 7.14E-04 | 29.10        | -1.62                        |
|                  | 0.4 | -3649.42  | -8.12     | 0.8863 | 6.80E-04 | 30.34        | -1.31                        |
|                  | 0.5 | -3806.20  | -7.84     | 0.8958 | 6.51E-04 | 31.65        | -0.98                        |
|                  | 0.6 | -3970.40  | -7.55     | 0.9045 | 6.26E-04 | 33.01        | -0.65                        |
|                  | 0.7 | -4142.23  | -7.24     | 0.9122 | 6.04E-04 | 34.44        | -0.30                        |
|                  | 0.8 | -4321.87  | -6.92     | 0.919  | 5.86E-04 | 35.93        | 0.06                         |
|                  | 0.9 | -4509.42  | -6.59     | 0.9247 | 5.71E-04 | 37.49        | 0.44                         |
|                  | 1   | -4704.99  | -6.24     | 0.9294 | 5.59E-04 | 39.12        | 0.83                         |
|                  | 1.1 | -4908.59  | -5.88     | 0.933  | 5.50E-04 | 40.81        | 1.23                         |
|                  | 1.2 | -5120.19  | -5.51     | 0.9357 | 5.44E-04 | 42.57        | 1.65                         |
|                  | 1.3 | -5339.72  | -5.12     | 0.9373 | 5.40E-04 | 44.39        | 2.08                         |
|                  | 1.4 | -5567.05  | -4.72     | 0.9381 | 5.38E-04 | 46.28        | 2.52                         |
|                  | 1.5 | -5802.00  | -4.31     | 0.938  | 5.38E-04 | 48.24        | 2.97                         |
|                  | 1.6 | -6044.38  | -3.88     | 0.9371 | 5.40E-04 | 50.25        | 3.44                         |
|                  | 1.7 | -6293.93  | -3.44     | 0.9355 | 5.44E-04 | 52.33        | 3.92                         |
|                  | 1.8 | -6550.39  | -2.99     | 0.9332 | 5.50E-04 | 54.46        | 4.41                         |
|                  | 1.9 | -6813.47  | -2.53     | 0.9305 | 5.56E-04 | 56.65        | 4.91                         |
|                  | 2   | -7082.87  | -2.06     | 0.9273 | 5.64E-04 | 58.89        | 5.42                         |
|                  | 2.1 | -7358.29  | -1.58     | 0.9237 | 5.74E-04 | 61.18        | 5.94                         |
|                  | 2.2 | -7639.41  | -1.09     | 0.9198 | 5.84E-04 | 63.51        | 6.47                         |
|                  | 2.3 | -7925.94  | -0.59     | 0.9158 | 5.94E-04 | 65.90        | 7.01                         |
|                  | 2.4 | -8217.58  | -0.08     | 0.9115 | 6.06E-04 | 68.32        | 7.55                         |
|                  | 2.5 | -8514.04  | 0.44      | 0.9072 | 6.18E-04 | 70.79        | 8.11                         |
|                  | 2.6 | -8815.05  | 0.97      | 0.9028 | 6.31E-04 | 73.29        | 8.67                         |
|                  | 2.7 | -9120.34  | 1.50      | 0.8984 | 6.43E-04 | 75.83        | 9.24                         |
|                  | 2.8 | -9429.66  | 2.04      | 0.894  | 6.56E-04 | 78.40        | 9.81                         |
|                  | 2.9 | -9742.78  | 2.59      | 0.8896 | 6.70E-04 | 81.00        | 10.39                        |
|                  | 3   | -10059.48 | 3.14      | 0.8853 | 6.83E-04 | 83.63        | 10.97                        |
|                  | 3.1 | -10379.54 | 3.70      | 0.8811 | 6.96E-04 | 86.30        | 11.56                        |
|                  | 3.2 | -10702.78 | 4.27      | 0.877  | 7.10E-04 | 88.98        | 12.16                        |
|                  | 3.3 | -11029.02 | 4.84      | 0.8731 | 7.23E-04 | 91.70        | 12.76                        |
|                  | 3.4 | -11358.08 | 5.41      | 0.8692 | 7.36E-04 | 94.43        | 13.36                        |
|                  | 3.5 | -11689.80 | 5.99      | 0.8654 | 7.49E-04 | 97.19        | 13.97                        |
|                  | 3.6 | -12024.04 | 6.57      | 0.8618 | 7.62E-04 | 99.97        | 14.58                        |
|                  | 3.7 | -12360.66 | 7.16      | 0.8583 | 7.74E-04 | 102.77       | 15.20                        |
|                  | 3.8 | -12699.54 | 7.75      | 0.8549 | 7.87E-04 | 105.58       | 15.82                        |
|                  | 3.9 | -13040.55 | 8.35      | 0.8516 | 7.99E-04 | 108.42       | 16.44                        |
|                  | 4   | -13383.58 | 8.95      | 0.8485 | 8.11E-04 | 111.27       | 17.06                        |

| $\beta$ (°C/min) | n   | Slope     | Intercept | $R^2$  | p-value  | $E$ (kJ/mol) | $\ln(k_0)$ (s <sup>-1</sup> ) |
|------------------|-----|-----------|-----------|--------|----------|--------------|-------------------------------|
| 20               | 0.1 | -2540.19  | -9.92     | 0.846  | 8.20E-04 | 21.12        | -3.18                         |
|                  | 0.2 | -2655.31  | -9.71     | 0.8604 | 7.67E-04 | 22.08        | -2.92                         |
|                  | 0.3 | -2776.07  | -9.48     | 0.874  | 7.20E-04 | 23.08        | -2.65                         |
|                  | 0.4 | -2902.72  | -9.25     | 0.8867 | 6.79E-04 | 24.13        | -2.37                         |
|                  | 0.5 | -3035.49  | -9.00     | 0.8983 | 6.44E-04 | 25.24        | -2.08                         |
|                  | 0.6 | -3174.60  | -8.75     | 0.9088 | 6.14E-04 | 26.39        | -1.78                         |
|                  | 0.7 | -3320.21  | -8.48     | 0.9182 | 5.88E-04 | 27.60        | -1.47                         |
|                  | 0.8 | -3472.48  | -8.20     | 0.9264 | 5.67E-04 | 28.87        | -1.15                         |
|                  | 0.9 | -3631.52  | -7.91     | 0.9334 | 5.49E-04 | 30.19        | -0.81                         |
|                  | 1   | -3797.39  | -7.61     | 0.9393 | 5.35E-04 | 31.57        | -0.46                         |
|                  | 1.1 | -3970.12  | -7.29     | 0.9439 | 5.24E-04 | 33.01        | -0.10                         |
|                  | 1.2 | -4149.69  | -6.97     | 0.9473 | 5.16E-04 | 34.50        | 0.27                          |
|                  | 1.3 | -4336.03  | -6.63     | 0.9497 | 5.11E-04 | 36.05        | 0.65                          |
|                  | 1.4 | -4529.02  | -6.28     | 0.9509 | 5.08E-04 | 37.65        | 1.04                          |
|                  | 1.5 | -4728.53  | -5.92     | 0.9512 | 5.07E-04 | 39.31        | 1.44                          |
|                  | 1.6 | -4934.36  | -5.55     | 0.9506 | 5.09E-04 | 41.02        | 1.86                          |
|                  | 1.7 | -5146.32  | -5.17     | 0.9492 | 5.12E-04 | 42.79        | 2.28                          |
|                  | 1.8 | -5364.16  | -4.77     | 0.9471 | 5.17E-04 | 44.60        | 2.72                          |
|                  | 1.9 | -5587.65  | -4.37     | 0.9444 | 5.23E-04 | 46.46        | 3.16                          |
|                  | 2   | -5816.52  | -3.96     | 0.9412 | 5.30E-04 | 48.36        | 3.61                          |
|                  | 2.1 | -6050.50  | -3.54     | 0.9376 | 5.39E-04 | 50.30        | 4.07                          |
|                  | 2.2 | -6289.35  | -3.11     | 0.9337 | 5.48E-04 | 52.29        | 4.54                          |
|                  | 2.3 | -6532.79  | -2.67     | 0.9296 | 5.59E-04 | 54.31        | 5.01                          |
|                  | 2.4 | -6780.58  | -2.23     | 0.9252 | 5.70E-04 | 56.37        | 5.49                          |
|                  | 2.5 | -7032.46  | -1.78     | 0.9208 | 5.81E-04 | 58.47        | 5.98                          |
|                  | 2.6 | -7288.20  | -1.32     | 0.9163 | 5.93E-04 | 60.59        | 6.48                          |
|                  | 2.7 | -7547.58  | -0.86     | 0.9117 | 6.05E-04 | 62.75        | 6.98                          |
|                  | 2.8 | -7810.37  | -0.39     | 0.9072 | 6.18E-04 | 64.94        | 7.48                          |
|                  | 2.9 | -8076.39  | 0.09      | 0.9027 | 6.31E-04 | 67.15        | 7.99                          |
|                  | 3   | -8345.44  | 0.57      | 0.8983 | 6.44E-04 | 69.38        | 8.50                          |
|                  | 3.1 | -8617.34  | 1.06      | 0.894  | 6.56E-04 | 71.65        | 9.02                          |
|                  | 3.2 | -8891.93  | 1.55      | 0.8898 | 6.69E-04 | 73.93        | 9.55                          |
|                  | 3.3 | -9169.06  | 2.05      | 0.8857 | 6.82E-04 | 76.23        | 10.07                         |
|                  | 3.4 | -9448.57  | 2.55      | 0.8817 | 6.95E-04 | 78.56        | 10.60                         |
|                  | 3.5 | -9730.34  | 3.05      | 0.8778 | 7.07E-04 | 80.90        | 11.14                         |
|                  | 3.6 | -10014.24 | 3.56      | 0.8741 | 7.19E-04 | 83.26        | 11.67                         |
|                  | 3.7 | -10300.15 | 4.07      | 0.8705 | 7.32E-04 | 85.64        | 12.21                         |
|                  | 3.8 | -10587.97 | 4.59      | 0.867  | 7.43E-04 | 88.03        | 12.76                         |
|                  | 3.9 | -10877.59 | 5.11      | 0.8637 | 7.55E-04 | 90.44        | 13.30                         |
|                  | 4   | -11168.92 | 5.63      | 0.8604 | 7.67E-04 | 92.86        | 13.85                         |
